# Supplementary material for: Three-gene risk model in papillary renal cell carcinoma: a robust likelihood-based survival analysis
Source: PubMed Central journal article supplement (PMC7695399; doi:10.18632/aging.104001), 2020-11-05
Supplement: aging-12-104001-s002..pdf [file aging-12-104001-s002..pdf]

**SUPPLEMENTARY TABLE**

**Supplementary Table 1. Baseline of renal papillary cancer in TCGA.**

|                                 |     |        |
|---------------------------------|-----|--------|
| <b>Type</b>                     |     |        |
| Normal                          | 32  | 10.00% |
| Tumor                           | 288 | 90.00% |
| <b>Status</b>                   |     |        |
| Alive                           | 248 | 86.10% |
| Dead                            | 40  | 13.90% |
| <b>Age</b>                      |     |        |
| ≥ 60                            | 169 | 58.70% |
| <60                             | 116 | 40.30% |
| NA                              | 3   | 1.00%  |
| <b>Gender</b>                   |     |        |
| Male                            | 212 | 73.60% |
| Female                          | 76  | 26.40% |
| <b>Clinical_stage</b>           |     |        |
| I                               | 172 | 59.70% |
| II                              | 21  | 7.30%  |
| III                             | 51  | 17.70% |
| IV                              | 15  | 5.20%  |
| NA                              | 29  | 10.10% |
| <b>Clinical_M</b>               |     |        |
| M0                              | 95  | 33.00% |
| M1                              | 9   | 3.10%  |
| MX                              | 170 | 59.00% |
| NA                              | 14  | 4.90%  |
| <b>Clinical_N</b>               |     |        |
| N0                              | 49  | 17.00% |
| N1                              | 24  | 8.30%  |
| N2                              | 4   | 1.40%  |
| NX                              | 210 | 73.00% |
| NA                              | 1   | 0.30%  |
| <b>History_other_malignancy</b> |     |        |
| No                              | 233 | 80.90% |
| Yes                             | 55  | 19.10% |
| <b>Body Mass Index</b>          |     |        |
| <i>Normal (18.5-24.9)</i>       | 50  | 17.40% |
| <i>Overweight (25-29.9)</i>     | 86  | 29.90% |
| <i>Mild obesity (30-34.9)</i>   | 41  | 14.20% |
| <i>Moderate obesity (≥35)</i>   | 35  | 12.10% |
| NA                              | 76  | 26.40% |
| <b>AJCC-T</b>                   |     |        |
| T1                              | 193 | 68.06% |
| T2                              | 32  | 11.11% |
| T3                              | 59  | 20.49% |
| T4                              | 2   | 0.69%  |
| NA                              | 2   | 0.69%  |
