# Supplementary material for: Three-gene risk model in papillary renal cell carcinoma: a robust likelihood-based survival analysis
Source: publisher site journal article supplement (doi:10.18632/aging.104001), 2020-11-05
Supplement: Supplementary file [file aging-v12i21-104001-supplementary-material-SD1.pdf]

SUPPLEMENTARY FIGURES

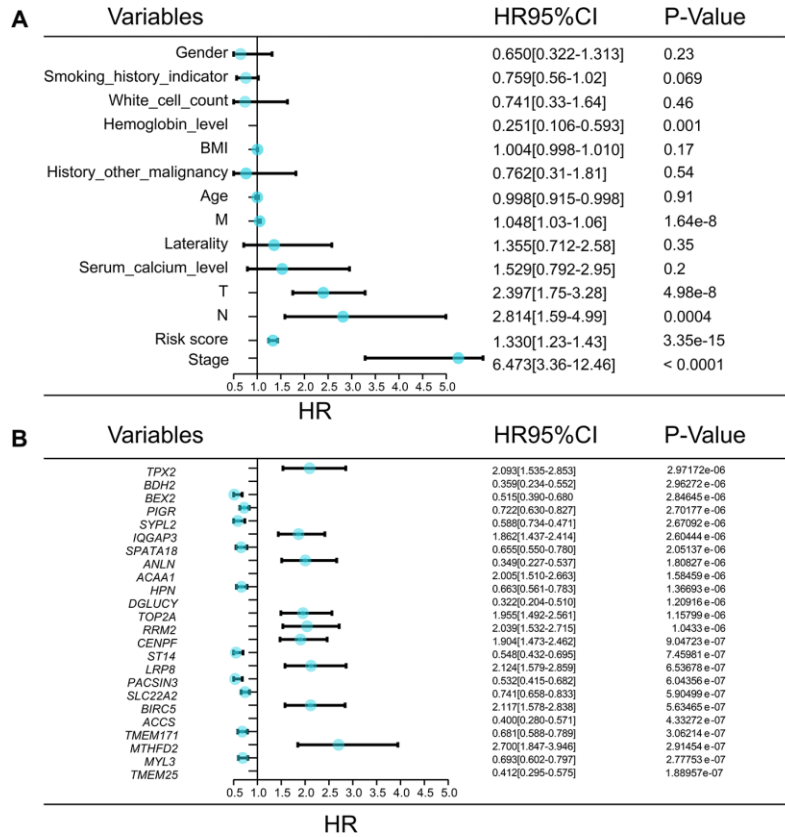

Supplementary Figure 1. Forest plot of prognostic factors. (A) The clinical prognostic factors are shown, including HR and P-values. (B) The protein coding prognostic factors are shown, including HR and P-values.

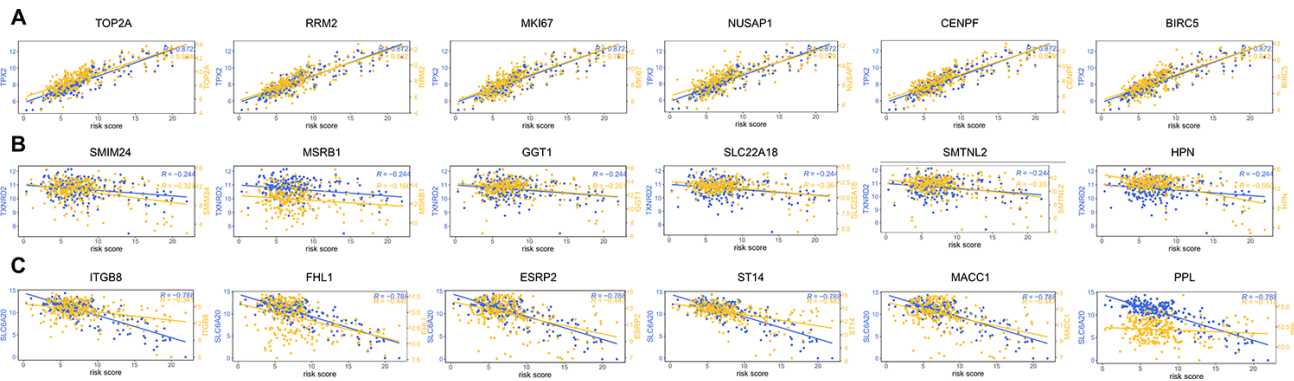

Supplementary Figure 2. The correlation between risk score and the co-expression genes of (A) TPX2, (B) TXNRD2 and (C) SLC6A20.
