# Supplementary material for: Three-gene risk model in papillary renal cell carcinoma: a robust likelihood-based survival analysis
Source: Aging (Albany NY). 2020 Nov 5;12(21):21854–73. doi: 10.18632/aging.104001 (PMC7695399; doi:10.18632/aging.104001)
Supplement: Supplementary Table 2 [file aging-12-104001-s003..xlsx]

## Sheet: Sheet1
id
ESPL1
FAM45A
MAMDC2
INTS4
BBOF1
TMEM231
NSMCE3
RNF25
ZNF267
BCO1
ZNF747
RBP1
NRIP2
LILRB1
NDUFAF1
CREB3L4
ZRANB1
EMID1
NOC3L
BRSK1
ST6GAL2
STPG1
PHTF2
IFT74
ZNF48
MYLK4
TXNL4B
PIBF1
KBTBD6
UBE2F
PDCL3
POLG2
TMEM237
TEX9
POLR3GL
GANC
CFAP157
RNGTT
SWI5
STXBP5
ERI1
NUBPL
SEPT4
HIST1H2BK
RNASEH2A
NUDT15
L3MBTL4
GNL3L
IDNK
RHBDD3
KCNV1
PKNOX1
CLEC10A
RPF1
TAF5L
TMEM177
ARHGEF25
TLR5
SHQ1
TRIM32
TMEM161B
RNF215
MRGBP
DBR1
NGFR
NTHL1
ZNF780B
SURF2
PPOX
ZNF480
NCF4
RPS6KC1
CDH23
SPICE1
PAQR3
NAA35
PPIP5K1
TMEM234
KRTCAP2
PLEKHN1
PAQR4
FGD2
NMNAT3
DNAH7
HSPA14
RASSF1
PDE4B
ZNF75A
BIN2
SNAPC4
YJU2
DUS3L
EXOC3L4
C4orf19
BST1
ATF1
ANKRD24
ZBTB43
BCLAF3
SOX18
GPSM1
EVA1B
APBA1
PAXIP1
CRAMP1
MRE11
EXOC8
CENPC
ZNF329
TTC23
ADRB2
SLC22A4
ERICH5
FAXC
TSEN15
ZNF776
CDKL2
C12orf43
ARMC3
CCDC74B
COA6
MOSPD1
RRAGB
AAMDC
FAM174A
TRPC1
BAG2
INPP5E
SDCCAG8
LMNTD2
SPAST
FOXM1
NSUN7
APTX
CSTF3
CCDC174
MRPL48
NMB
RBM12B
RSPH1
CCDC149
ZNF587
ARV1
MTF2
EOGT
KCNH3
TATDN3
NUDCD2
HEATR3
TLCD1
TMEM102
ING5
C15orf40
L3HYPDH
MSL3
FCMR
MINDY3
TRERF1
FHDC1
ZNF22
GIMAP7
MC1R
IRAK3
LSM10
GPR173
TMEM69
CYB5R4
FGF12
ZNF641
NPRL2
ZBTB14
RND2
MFNG
TFB2M
STX17
CPEB3
ZCCHC2
MFSD11
SFMBT2
NOL9
CDKAL1
UST
ZNF300
SRBD1
RASAL3
IL22RA1
GPR4
CACTIN
SUPV3L1
ERV3-1
TBC1D12
ZFP3
MMP28
TMEM223
TEPSIN
MFSD9
CEP112
EIF1AD
PLAG1
CNOT10
CCDC68
ESCO1
WBP1
ERCC6L2
BTBD19
ALG10B
ILKAP
CDKN2AIPNL
SAMSN1
VAMP4
CXorf56
IGF2BP1
GCFC2
ABCB7
IL34
OPHN1
PQLC2
EEF1E1
RNF169
RPAP2
NEU3
ADCY7
EXOSC4
IKZF5
GPM6B
JAK2
DCAF15
MRPL1
SAMD10
ARMC5
B3GNT8
SLC30A4
UVSSA
CIB2
ZSCAN30
PRRG2
SLC38A6
ATXN7L2
NPM3
C8orf59
IQCB1
NFKBIL1
TEX30
MYO3A
RRP15
MAD2L2
ACAP1
B3GNT5
ACTR6
SYNGAP1
ZC2HC1A
MCTP2
ATXN3
SYT14
LCK
MECR
COL26A1
ARL13B
TMEM120B
PCSK4
UQCC3
C22orf46
GCNT4
ADAMTS13
ARNTL2
RGS19
TTN
ZSCAN29
FAM49A
EMSY
GRK3
SHROOM1
NRF1
MTMR9
ZNHIT6
ARHGAP10
FBXL6
RRP9
TIGD5
ISPD
SPATA6
EDC3
CPSF4
THOC1
CTSV
CRYZL1
PSORS1C1
FAM131A
POGLUT1
PSMA2
ZNF627
MRPL39
RPL26L1
LXN
TRIM21
PIGP
PRDM1
PLIN5
FAM120C
SPINDOC
ZNF579
DUOX1
KLHL14
PGAP2
ZNF134
NIF3L1
ORC2
OSCP1
NPHP1
SPATA33
RCN3
TRNT1
MSANTD4
SLC26A6
ZNF471
LRIG2
EEF1AKMT3
DDX19B
CLCN2
HPSE
VPS33A
VTI1A
IQCG
NEIL2
CD180
ALKAL2
ZNF711
DCAF12L1
YOD1
BCL6B
ZNF783
CCDC86
ZNF426
LRP8
HPS6
GALNT6
TMEM200B
GTF2E2
MORN4
ILK
CD7
CLCC1
TUBE1
MSANTD2
APOPT1
ZNF777
FAR2
RPUSD4
TTBK2
EFCAB13
TMEM143
CINP
TMEM42
ZFYVE28
ERMARD
HCN3
TRIM11
LRRCC1
TRMT10C
PGP
PIGM
CSF2RA
DZANK1
MOB4
RILP
SLC25A48
CDC37L1
IBA57
RNF31
SLC35E3
CCP110
BCO2
KAT14
RBM7
SLC36A4
SLC46A1
ISCA2
MTSS1L
HCFC2
CPED1
NUP54
SHISA4
OSR1
ANKEF1
SNAP25
BIRC5
DDO
LYRM4
PRX
SNX24
P2RX7
RNF34
CCR5
SNX25
GFPT2
DDX28
AKAP7
TMEM138
WDR24
TRIAP1
LRRC8B
ZNF581
WDSUB1
IKBKE
APIP
GPR180
TMEM62
ADRA2C
NFATC2
NEDD1
ESF1
SNAPC2
NACAD
ZBTB48
POP7
WDR77
TEAD4
B3GLCT
TMEM79
DIPK2B
ABT1
MALSU1
MCM8
MRPL50
CCNB1
TTC12
TRMU
OTULINL
TRIM23
LRRC57
RPP25L
ZNF195
MRPS11
GMEB2
TAF11
ZNF865
RIC3
PCDHB2
GPX7
LIG4
MAMLD1
RTTN
RBM27
SMYD4
SLC17A4
TMEM128
SIRT6
OVOL1
TLR7
KCNK6
RIPOR2
REEP4
RRS1
ZNF133
IFT20
CYB561D2
NGDN
HDAC9
SCN4B
METTL5
FANCF
NSL1
TMEM144
DNMT3B
METTL2A
ZNF577
METTL14
PRC1
NMI
SNRNP27
HMBS
OSGEP
MAP3K9
POLR3C
DUSP14
RAD1
KLHL20
PGAP1
ZNF514
TEX10
MYBL1
NDUFAF4
PANX1
GTF2F2
ABHD5
SRD5A3
JAM2
SMAD1
INTS13
ACSM1
CCDC85B
IQANK1
CHTF18
FAM126A
CCNH
CPOX
ATRNL1
CORO2A
ESYT3
CKAP2
SEPT5
DCTN6
LILRA2
C3orf52
QTRT2
FBXO30
WDR44
MCTS1
FHIT
FAM78A
HAUS4
GPANK1
PANK4
KCTD17
CCDC71
MFSD4B
ZNF91
ZNF440
PRR5L
ARL14EP
ZNF131
SMG9
ANAPC1
KMT5A
FAM241A
IL15RA
METTL8
TRIM68
TMEM107
ABRAXAS2
NPAT
MRPL22
MREG
FUT4
CHMP4C
TRIM15
ARSG
MRM3
GNPDA2
RPP14
DCUN1D3
NAP1L2
FAM117A
GPR35
ETFRF1
FBXL14
PUM3
FAM114A2
ZSWIM5
ABHD8
SARM1
ZNF518B
MAPKBP1
PCDHB15
PLD4
MSANTD3
NCAPD3
VWCE
FAHD2A
ERMAP
MIER3
ABCB10
MTLN
GGCT
MEX3D
ZNF688
ATP8B3
BID
SELL
PTBP2
KRTCAP3
UBXN2A
FTSJ1
INPP5F
RFC5
POLD4
ACVR2B
ELP6
INHBB
CEP131
FGD1
TM2D1
METTL1
SPAG16
ZFP62
PRSS16
DTNB
DCK
PYROXD2
HSBP1L1
NTAN1
CD58
NOC4L
PNO1
GCA
XXYLT1
SPOUT1
GALT
EXOSC5
EVC2
SYT16
WRN
ZC3H6
STON1
TMEM260
IL17RE
EDN2
FASTKD1
TMEM169
PCDHB14
KYNU
FAM210A
C12orf65
STN1
FES
PEX3
HEPH
RPAP3
PWWP2B
HYDIN
MOCOS
IGIP
TCHP
DIMT1
OMA1
CDK5RAP1
FBXL15
UBIAD1
CARNMT1
AZI2
DOK7
FAM217B
TBC1D7
ZBTB46
SNX21
PDRG1
USE1
SDHAF3
ZNF75D
NMNAT1
RALGAPA1
ZSWIM7
DEF6
ZNF28
TBCEL
TRMT6
TUSC1
SERTAD4
LRRC37A3
LSM2
SOWAHB
WARS2
MRTO4
CDYL2
TCF7L1
NXPE3
PYM1
NLE1
GPN3
FAM131C
DNAJC12
THYN1
JDP2
FLI1
ATAD2
EVI5
MKNK1
DEDD
TENT4A
CDYL
MGME1
PCDHA10
C5orf22
ANG
MILR1
DPH2
TMEM99
HDAC4
NFKBIB
CEP63
LSM1
E2F3
FGD3
RASA2
PTGER4
C15orf48
PLEKHG5
RIC8B
RNF166
PUS1
MLKL
CHIC1
PRDM11
CPEB1
LCMT2
PBX3
SYTL4
BMT2
CCDC102A
HACE1
ACOT1
RFX2
RGS9
DLG4
FAM92A
FA2H
TANGO6
PSMD9
FBXO8
PHTF1
NFATC1
TMEM11
AC005041.1
EYA2
TMEM68
EMB
MYCBP
REXO4
ANKRD13C
TRMT61A
DCAF17
RCHY1
ADAM12
SEPT3
ANKRD6
DOLK
RAB2B
SLC19A1
LONRF1
CHST10
CD86
ZSCAN25
APBA2
RLF
C7orf43
GSTA4
CACNB2
SYNGR3
CDK11B
RDH5
TMEM91
DPH7
HGFAC
ARHGAP9
ANO8
CHCHD1
TATDN2
ZNF507
KLRG2
N4BP2L1
TRAF5
TWNK
ZNF335
ZNF319
CFAP43
MYOM2
ELMO1
IMPA1
DNAAF1
CCDC9
CCDC127
TLNRD1
PPP1R3G
TNK1
CPNE4
ACOT8
KCTD13
ATG101
KRBA1
RACGAP1
IFI44
WASHC3
ITGA9
INTS8
OXNAD1
USP30
SCO2
ELL
KNOP1
ANKRD13B
UHRF2
INO80C
CEACAM19
PIP4P2
NT5M
TUBGCP3
INPP1
ATAD3A
LMTK3
AP5S1
KLHL18
OVGP1
ZNF467
CFAP70
SNRPD1
SLC4A3
BTNL9
EMC8
BMP2K
POLR2I
KNTC1
AIMP2
MAML3
TRIM55
FAM229B
PPIL4
ENOX2
RIOX2
CCDC22
RNF8
DOK1
GPRIN1
UBLCP1
GPKOW
WDR20
NUAK1
WTIP
BTBD10
CASC10
TRPV2
CKS2
KATNAL1
TVP23B
PFKFB4
GOSR2
S100PBP
USP28
DPM1
UVRAG
PILRA
ATP7A
CARD6
C22orf39
BRPF1
ARHGEF38
ARHGAP28
RPUSD3
SMIM20
SETD4
PLEKHG6
SMG8
AGO4
NOL8
SLC25A26
THOC5
NOL10
PKP2
ATG12
EIF2B4
TCF7
RASIP1
USP42
FIG4
SNRNP35
ZBTB11
TMEM119
MMAA
ZNF205
NCR3LG1
MAIP1
WDR47
MOB2
DHRS11
NUPL2
ZC3H12C
ZNF513
ZNF436
SCRN3
RNF2
ORC3
MOB3C
RFX1
DDX60L
ERG
GPN2
GABPB1
SNRNP40
TMEM18
ATP6V0A2
TTC21B
SFMBT1
BBS12
TRIM52
BLZF1
LACTB
ANKS1B
DHRS12
SIRT1
TAGAP
TRAPPC6B
QSOX2
SLC43A3
USP13
MDGA1
FMC1
SDF2L1
BRAP
C20orf96
REPS1
LSM8
BEX1
MVB12B
PEG3
LZIC
NOS3
ENTR1
GPATCH4
CDK7
TIMM10
NUBP1
MAP3K4
PAAF1
MLH3
HGF
SUGP1
TMOD2
CASZ1
AVPI1
FBXO41
METTL23
MMP19
TMEM39A
IPO11
VAV1
CARD8
ZFP64
BRWD3
ZNF562
FAM219A
BICDL2
ZNF880
EPC1
CNPY2
RFT1
TTC5
LTB
ZNF853
ZBTB7C
CA11
CEP41
ORC5
VIPAS39
PHF13
ZFAND1
TMEM44
ZNF544
CLIC2
MROH6
AGO3
TARSL2
ZKSCAN5
LRRC25
RSBN1
AOAH
POLD1
INPP5A
PIGX
SIK1B
H3F3A
LGALSL
CASP9
HERC6
THAP7
ZNF639
KIZ
USPL1
CYP2U1
WWOX
JRK
FAM89B
CLDN23
COPZ2
DRC7
L3MBTL1
GADD45G
USP21
ECM2
TTLL4
ZNF787
PSPC1
MPHOSPH9
RTP4
RNF126
NOMO2
LDLRAD4
ZDHHC21
NR2C1
MEIS2
ARHGAP25
2019-03-01
NEK8
TGS1
C7orf26
CHCHD6
CFAP44
ZDHHC13
RPS6KB2
ZNF468
JADE3
PHLPP1
STRIP1
ANKRD54
MTO1
C19orf54
DHX34
CASP10
LY75
AP3M2
DDX31
MED8
CWC22
LAT2
TCF19
TRAPPC13
SHB
GEMIN4
KCNJ8
TNFSF15
NBPF1
RSRC1
PDE7B
RPGRIP1L
SLC25A43
ZNF789
LARP1B
TWISTNB
GPR157
ANGEL2
MTM1
INTS2
LRMP
R3HDM1
SH3BP5
PRR36
NARS2
ZNRF1
FAM189A2
INTU
ALG12
DNAJC30
CCL3
ERICH1
B3GALT6
HAUS6
ERO1B
RNASEL
ARPC5L
BCS1L
ARHGEF15
MST1R
PLEKHA8
ZNF281
CHN2
PEX14
BBS9
KLHL22
LRRC28
SPIRE2
PUS7L
ALPK1
SMARCAL1
HOPX
PRKAB2
GMPPB
MOK
JOSD2
C16orf70
NEK4
ZBTB22
CAPRIN2
MPHOSPH10
TAF9
EIF4E
UGGT2
QRSL1
AK7
TIMM21
CDON
LMNB1
KCNIP4
N4BP3
FKBP14
NUMBL
PRPF39
GPALPP1
POLD3
TMEM201
PRMT7
PLCD4
MICA
GCH1
TUT7
DHDH
CHKA
EPOR
ALG13
GAREM2
PLEKHG1
ANLN
TOPORS
CAAP1
MORN2
IMMP2L
CNTNAP1
UMPS
TDRD7
RNPC3
TAF13
NMT2
RABGGTA
RIPK2
TMEM175
FAM200B
ZNF558
JAG2
DNAJB5
CFAP298
WHAMM
ZCCHC17
PIGH
EDA2R
TRMT2B
PEAR1
GTF2A2
IRAK2
PLCXD1
SOCS4
SETDB2
SREK1IP1
TAF4
AGMO
CEP120
ZNF43
RIN1
NAALADL2
ATAD3B
IL1RAP
RABL2B
TXLNG
PLEKHG4
RPF2
DUSP10
ARHGAP44
SMCO4
ANKRD42
MSH2
CETP
SENP7
GMIP
FBXO42
MISP3
IFNAR2
KLHL2
RASGRP3
TMEM125
GAL3ST4
MYBL2
AMY2B
WDFY2
NGLY1
OTULIN
KIF3A
ANO5
KCND3
COA7
LYRM7
PTGR2
MAP4K2
IRAK4
SENP3
TYW3
ZNF580
ZNF260
C11orf1
PEX10
LMLN
SH2D3C
RFLNB
HEATR5A
AKAP6
TMEM183A
ELF2
STEAP4
TCEAL3
GDF11
SIRT7
POLE4
EXPH5
EFL1
RCSD1
IL27RA
PREP
FBXL7
POLR2M
TOP3A
ZNF32
DGKQ
MUS81
CCDC82
C1orf226
CHCHD5
WDR75
PLGRKT
TRIM66
TLK2
NMRK1
CTDP1
SMC2
ADGRE2
LPAR1
SENP5
RP2
ZDHHC1
RTL8B
RMC1
C6orf136
ZNF37A
LZTS1
KLHL6
PMF1
KANSL2
RNASE6
ZNF277
MKS1
APCDD1
IFT46
PEX16
KIAA1324L
SMNDC1
ROR1
LRRC42
CDK17
ADSSL1
PLEKHA3
GNAL
STK11IP
POLL
ODF2L
C1orf162
KLF16
ZC3H12A
PHF11
HOMEZ
DDX51
C11orf80
CLEC18B
MINPP1
PCSK7
B9D1
SCAPER
SMUG1
ZNF736
IFIH1
SKA2
SLC16A10
INO80D
VEGFC
CYB561D1
MAP6
MIGA2
HSDL1
HTRA2
SYCE1L
BCL10
POLR3D
AKAP5
ASCC1
SLC29A2
CRYBG3
CBX4
TYW1
C1orf123
TRMT2A
KIAA0895
MBTD1
TMEM178A
MPND
PNPT1
CMC2
ADAMTS10
SLC25A28
GHR
SLC25A27
C1QTNF6
GPRIN2
ACBD6
GRTP1
TGIF2
LYRM9
LRFN4
IL16
ANAPC4
BTN2A1
ACD
POC1B
CASP1
STX2
NUSAP1
GPRASP1
STK3
PIAS2
DNASE1L3
TET3
FAM126B
RARS2
MCAT
NOM1
RBAK
GPRASP2
CASP7
SPEG
DAAM2
SEMA4F
GGPS1
GLI4
INMT
APH1B
USP46
SNAPIN
E4F1
MED11
SOCS5
COX18
GZF1
LARP6
FAM160B1
ARMC6
PTGER2
DTYMK
CDK2
NDUFAF8
UEVLD
ECD
FCHSD1
CCDC91
ZNF213
WASF3
NFATC4
MAP3K12
ZNHIT3
HIRIP3
MRPS14
KRI1
TBK1
CORO6
TNFRSF10C
CROCC
SLC9A6
TMEM254
KDM7A
WDR37
HSD17B8
ZNF791
CCDC120
ATPAF2
KYAT3
CNST
ADAM8
TCF7L2
FKTN
NAGPA
PGGT1B
HRCT1
RFX7
ZSWIM6
ARID4A
PET100
BCAS2
SEH1L
HOXB5
EDAR
KCTD7
EPHB1
PANK2
FLYWCH2
GLIPR1
SPEF2
DENND1B
C8orf82
MRNIP
PIFO
LAMA2
C1GALT1C1
EXD3
SS18L1
THAP12
MRPL21
IFT81
ZNF451
CFAP20
EPSTI1
FKBP11
APOO
GTF2H3
PYCR3
RGS10
ZNF605
RRP1
MAP3K7CL
GFER
POLR3A
PCID2
CACNB1
POP4
C5
CCDC43
DIRC2
TOMM40L
PRKCZ
PTPRE
LCLAT1
SEMA6C
SPATA2
RAMP2
ZNF710
RPUSD1
FAM222A
GLIS1
C3orf18
ZNF326
IKZF3
SPTBN5
CLPB
FAM173A
CHAMP1
CEPT1
GFOD2
FAN1
CEP164
CDC40
ZBED4
FHOD1
TTLL5
MTF1
LRP12
RAB27A
ADAP2
ZNF800
FERMT1
PIP5K1B
RAD17
SERPINB9
WHRN
COMMD8
APLN
WAS
CFAP69
ZNF280D
STOML1
CHFR
CD300A
FAM118B
SDE2
TMC8
CFAP221
ARMH3
COMMD10
GMFG
ZBTB5
FAM117B
TEAD3
SSBP2
SLC25A40
ZNF445
TET2
MRPL9
WDR66
PIP4P1
ZNF528
FIP1L1
RFC2
FAM122A
GPR176
GIMAP8
FAM57A
RBPMS2
PLEKHH3
FRMD6
NOA1
SMIM10L1
RPS6KA6
RRNAD1
ABHD17A
AIDA
POLR2D
ASB6
CBY1
MRPL58
PIGN
WDR7
FOSL1
PIAS3
ADAP1
CDK5
ME3
RASGRP1
GJA4
ZFYVE19
CRELD2
CCDC24
AP1S2
PLK3
DMWD
ZPR1
TRIM9
TOGARAM1
GABPA
GNPNAT1
ZCCHC8
MED17
OCEL1
MORC3
HOXC4
LST1
LRWD1
POLK
KCNQ3
DUSP7
XYLB
VPS45
IRF7
DLL4
GLI3
NEK1
ZNF746
CTPS2
GSTZ1
DAAM1
ZNF276
MLF1
INTS5
FARSB
WNT5B
UQCC2
IL2RB
IL18BP
CNOT9
CD274
THAP5
ZEB1
AP1AR
C6orf47
NDC1
TRAF2
HACL1
NAA25
HPS5
TUBG2
UBTD2
RHNO1
C18orf25
ORAI1
RNF43
TYSND1
BRINP1
SLIRP
PPP1R8
SNAPC3
OSBPL7
TMEM97
MX2
DRG2
CARD19
TXNDC9
CCDC90B
NIFK
SAMD8
LNX2
ZNF444
ARAP2
CEP170
MRPS9
HFE
GOLGA1
YIF1B
TAGLN3
LARGE1
PLAGL2
BMPR1A
PRKCH
MTX3
RAVER2
RIC1
GSKIP
CEP192
DYNC1LI1
TTC30A
ENDOV
KCNK1
FOXRED1
EIPR1
MYCL
DNAJC2
TNFSF9
BMP8B
YDJC
SYNJ1
IQGAP3
ICK
ABI3
C11orf95
ATG4D
CNOT4
FAM50B
EXOSC7
ARAP3
GATC
CCDC74A
NFU1
THEM4
MSH3
CSNK1G3
EEFSEC
TRABD2A
SH2D3A
SLC29A3
SPATA2L
GTPBP10
CORO7
SPN
APAF1
MFAP3
ZBTB16
RNF182
TIMM8B
CYTIP
PMS2
CDCA7L
ZNF334
PLEKHG2
IFIT5
MRPS36
KLC1
DGCR8
CDKL1
FAM172A
NIPAL2
DOCK10
APOBR
PNMA6A
UBXN10
PPP2R5B
FASTKD2
THOP1
LIG3
ANGPT2
AKAP8
ORMDL2
NRM
NFYB
TM2D3
AFF2
CPSF3
SLC26A9
PODN
LANCL2
PIGV
EME2
SAMD9
SNRPG
DIPK2A
CBLL1
ADAMTSL4
KCTD5
STOX2
TOR1B
FOXO4
LRRC14
SV2A
SERTAD3
PPP2R2D
GAS7
ABHD3
CTF1
NIPSNAP3A
INTS6
RCOR1
ZBTB37
BRF1
PICK1
COG6
NEMP1
ST6GALNAC4
ONECUT2
CHST13
TMEM126B
TMEM135
ACP6
GTF2H5
NUDT22
NPR2
ST3GAL5
MANEA
MAGI2
AP3S1
AP4M1
SRRM3
GEMIN5
EPC2
FOXJ2
PPT2
ADAM22
TBCC
HECA
GRK6
BBS10
C2orf68
RARB
MRPS22
IKZF1
ZNF317
XPNPEP3
DNAL4
AASS
NUDT3
SIKE1
CRISPLD1
KDM2B
HGH1
SLC1A4
DHX57
BRCC3
ALG8
SMC4
SMIM29
OSTF1
ZNF516
KIAA0513
MAPK7
JPH2
SPAG4
FLAD1
RBMS3
SNCA
SLC25A38
ZCCHC3
BOC
SNPH
ADK
PITHD1
WDFY4
COA5
SFT2D1
SDAD1
PHF19
CCDC137
PELI2
LPCAT4
STK38L
FBXL2
UNC50
SH3BP1
IRF2BP1
THAP11
TMEM80
HMG20A
CHML
PPIE
EBAG9
MRPL30
CHRAC1
APBB3
LYSMD3
TFIP11
STRBP
LSM7
PGF
MAPRE3
UPF3A
MXD1
SLC16A13
CHD1L
NANS
SLAMF7
RITA1
FAM204A
BSPRY
ARHGEF5
STYXL1
RPS6KB1
RAB5IF
STK32A
APOBEC3G
KCNE3
PIDD1
BBC3
AMMECR1L
DIS3L2
TSPYL2
HOMER2
LCAT
TMEM134
RPA3
MAST3
FAM193A
HNRNPLL
C2CD3
RASGRF2
POT1
MAPK8
APOL3
ZBTB21
STXBP4
TRPT1
CAPN3
SRCIN1
IQCK
SFXN4
PLA2G7
TPST1
ZBTB33
AMMECR1
WDR3
LCOR
ZNF561
TRIP4
NBEAL1
CYGB
MUC12
PPM1D
BABAM1
ARMCX1
NDE1
HIVEP1
MVD
JMJD6
SPRYD4
DOP1A
VPS72
ZNF302
DDX50
TOP1MT
ZNF117
KLHL29
DCAF13
HERC4
RANBP1
SPCS2
HOMER1
COLEC12
KNDC1
ITFG2
EVI2B
VPS37C
CENPX
ZNF330
NOSTRIN
FLVCR2
COMMD5
CYYR1
MRPL47
CLDN5
GLIPR2
MSL2
SPNS3
TAF2
SUSD3
ADO
MRPL13
SLAMF8
TMTC4
UCHL5
ZNF142
ANGEL1
DPH3
BAG4
MACO1
UMAD1
PRADC1
C17orf80
NAA40
LSM5
UTP25
MTRNR2L12
PNPLA7
WASF1
MRC1
ZNF623
GTF2H1
ATG14
FUZ
PIGC
CGREF1
ARHGEF6
ZDHHC17
UTP18
MYSM1
KIF2A
FAM149B1
BTN2A2
MAP3K6
RPAIN
SMC6
NAE1
PLPPR2
MLLT10
SMIM19
C19orf25
RAD9A
C9orf64
PAFAH1B3
PPP3R1
FAM214A
RNF144A
COMTD1
PPIL1
POP5
REXO1
CRY1
CCDC113
RAE1
BOD1
ABCD1
PRR5
SMOX
TNFAIP8L1
TTPAL
TMEM268
XYLT1
COX10
ZNF644
RHOD
AFF3
ALG5
ACCS
PDCD10
GALK2
KIF1BP
NBDY
NECAB1
MAGI3
ABCC10
CHST12
MLLT11
BRD9
ARL5B
ZNF397
IGDCC4
CSTF1
EXOSC6
AMIGO1
ATG5
BARX2
CUL2
BTRC
CAMLG
FAM98B
DPM3
MPPE1
TRIM65
SLC49A3
SLC24A1
GPAM
MKRN2
ZNF263
USP20
RALGPS1
TLL1
TAPT1
MNT
PLAA
RRP1B
TMEM70
GUF1
EMC2
USP3
RASSF5
FUOM
RELB
INIP
MRPL11
RNF170
ADARB1
NUS1
VPS37D
GXYLT1
ZNF266
LDAH
ARRB1
WDR27
CES4A
SLC36A1
PRAF2
IFT43
TMEM170A
XKR4
NIP7
NFRKB
UBTD1
KRCC1
MTMR1
SENP2
TUSC2
ISOC1
LEPR
RBM43
LY86
PSMD5
ZC3H3
[truncated: 8,116 more rows]
