# Supplementary material for: Three-gene risk model in papillary renal cell carcinoma: a robust likelihood-based survival analysis
Source: Aging (Albany NY). 2020 Nov 5;12(21):21854–73. doi: 10.18632/aging.104001 (PMC7695399; doi:10.18632/aging.104001)
Supplement: Supplementary Table 3 [file aging-12-104001-s004..xlsx]

## Sheet: Sheet1
id	random	group(1:Train set; 2:Test set)
TCGA-2K-A9WE-01A-11R-A38C-07	94.3518	2
TCGA-2Z-A9J1-01A-11R-A38C-07	80.1933	2
TCGA-2Z-A9J2-01A-11R-A38C-07	69.5668	2
TCGA-2Z-A9J3-01A-12R-A38C-07	46.9902	1
TCGA-2Z-A9J5-01A-21R-A38C-07	1.40183	1
TCGA-2Z-A9J6-01A-11R-A38C-07	90.3657	2
TCGA-2Z-A9J7-01A-11R-A38C-07	35.5522	1
TCGA-2Z-A9J8-01A-11R-A42S-07	52.2179	1
TCGA-2Z-A9J9-01A-11R-A42S-07	26.8318	1
TCGA-2Z-A9JD-01A-11R-A42S-07	88.5204	2
TCGA-2Z-A9JE-01A-11R-A42S-07	21.9627	1
TCGA-2Z-A9JG-01A-11R-A42S-07	5.8343	1
TCGA-2Z-A9JI-01A-11R-A42S-07	1.63675	1
TCGA-2Z-A9JJ-01A-11R-A42S-07	86.1576	2
TCGA-2Z-A9JK-01A-11R-A42S-07	76.7153	2
TCGA-2Z-A9JL-01A-11R-A42S-07	10.145	1
TCGA-2Z-A9JM-01A-12R-A42S-07	33.8242	1
TCGA-2Z-A9JN-01A-21R-A42S-07	73.2431	2
TCGA-2Z-A9JO-01A-11R-A42S-07	9.31772	1
TCGA-2Z-A9JP-01A-11R-A42S-07	14.8346	1
TCGA-2Z-A9JQ-01A-11R-A42S-07	60.0547	2
TCGA-2Z-A9JR-01A-12R-A42S-07	16.2063	1
TCGA-2Z-A9JS-01A-21R-A42S-07	60.2623	2
TCGA-2Z-A9JT-01A-11R-A42S-07	31.9937	1
TCGA-4A-A93W-01A-11R-A37K-07	24.4408	1
TCGA-4A-A93X-01A-11R-A37K-07	90.3246	2
TCGA-4A-A93Y-01A-11R-A37K-07	44.7647	1
TCGA-5P-A9JU-01A-11R-A42S-07	1.74458	1
TCGA-5P-A9JV-01A-12R-A42S-07	43.9489	1
TCGA-5P-A9JW-01A-11R-A42S-07	6.49467	1
TCGA-5P-A9JY-01A-11R-A42S-07	17.1047	1
TCGA-5P-A9JZ-01A-11R-A42S-07	9.3041	1
TCGA-5P-A9K0-01A-11R-A42S-07	55.2078	2
TCGA-5P-A9K2-01A-11R-A42S-07	48.2495	1
TCGA-5P-A9K3-01A-11R-A42S-07	79.38	2
TCGA-5P-A9K4-01A-11R-A42S-07	85.4635	2
TCGA-5P-A9K6-01A-11R-A42S-07	65.8864	2
TCGA-5P-A9K8-01A-11R-A42S-07	89.0654	2
TCGA-5P-A9K9-01A-11R-A42S-07	36.2876	1
TCGA-5P-A9KA-01A-11R-A42S-07	74.754	2
TCGA-5P-A9KC-01A-11R-A42S-07	26.038	1
TCGA-5P-A9KE-01A-11R-A42S-07	86.8935	2
TCGA-5P-A9KF-01A-11R-A42S-07	87.285	2
TCGA-5P-A9KH-01A-11R-A42S-07	87.6182	2
TCGA-A4-7286-01A-11R-A32Z-07	92.7353	2
TCGA-A4-7287-01A-11R-2139-07	39.8651	1
TCGA-A4-7288-01A-11R-A32Z-07	99.2415	2
TCGA-A4-7583-01A-11R-A32Z-07	95.8719	2
TCGA-A4-7584-01A-11R-2139-07	98.9877	2
TCGA-A4-7585-01A-11R-2139-07	4.81225	1
TCGA-A4-7732-01A-11R-2139-07	76.9353	2
TCGA-A4-7734-01A-11R-A32Z-07	30.5998	1
TCGA-A4-7828-01A-11R-2139-07	31.454	1
TCGA-A4-7915-01A-11R-2204-07	19.9557	1
TCGA-A4-7996-01A-11R-2204-07	74.3017	2
TCGA-A4-7997-01A-11R-2204-07	28.2887	1
TCGA-A4-8098-01A-11R-2404-07	12.959	1
TCGA-A4-8310-01A-11R-2404-07	79.2428	2
TCGA-A4-8311-01A-11R-2404-07	21.051	1
TCGA-A4-8312-01A-11R-2404-07	58.0092	2
TCGA-A4-8515-01A-11R-2404-07	95.5288	2
TCGA-A4-8516-01A-11R-2404-07	81.0259	2
TCGA-A4-8517-01A-11R-2404-07	75.9859	2
TCGA-A4-8518-01A-11R-2404-07	44.1833	1
TCGA-A4-8630-01A-11R-2404-07	75.6652	2
TCGA-A4-A48D-01A-11R-A24Z-07	78.1715	2
TCGA-A4-A4ZT-01A-11R-A26U-07	74.464	2
TCGA-A4-A4ZT-11A-11R-A26U-07	87.0447	2
TCGA-A4-A57E-01A-11R-A26U-07	17.4627	1
TCGA-A4-A57E-11A-11R-A26U-07	77.6287	2
TCGA-A4-A5DU-01A-11R-A28H-07	11.5204	1
TCGA-A4-A5XZ-01A-11R-A31O-07	43.247	1
TCGA-A4-A5Y0-01A-11R-A31O-07	8.14121	1
TCGA-A4-A5Y1-01A-11R-A28H-07	65.5406	2
TCGA-A4-A6HP-01A-11R-A31O-07	12.5434	1
TCGA-A4-A772-01A-11R-A33Z-07	78.8044	2
TCGA-A4-A7UZ-01A-12R-A355-07	53.5677	1
TCGA-AL-3466-01A-02R-1351-07	29.9124	1
TCGA-AL-3467-01A-02R-1351-07	97.5004	2
TCGA-AL-3468-01A-02R-1351-07	13.9814	1
TCGA-AL-3471-01A-02R-1351-07	58.3337	2
TCGA-AL-3472-01A-01R-1193-07	7.17632	1
TCGA-AL-3473-01A-01R-1193-07	50.4911	1
TCGA-AL-7173-01A-11R-2139-07	97.2168	2
TCGA-AL-A5DJ-01A-11R-A26U-07	69.7316	2
TCGA-AT-A5NU-01A-11R-A28H-07	79.6851	2
TCGA-B1-5398-01A-02R-1592-07	96.9163	2
TCGA-B1-7332-01A-11R-A32Z-07	37.5321	1
TCGA-B1-A47M-01A-11R-A24Z-07	48.5515	1
TCGA-B1-A47N-01A-11R-A24Z-07	80.6128	2
TCGA-B1-A47O-01A-11R-A24Z-07	18.8913	1
TCGA-B1-A654-01A-11R-A31O-07	97.817	2
TCGA-B1-A655-01A-11R-A31O-07	32.2205	1
TCGA-B1-A656-01A-11R-A31O-07	59.9407	2
TCGA-B1-A657-01A-11R-A31O-07	18.9017	1
TCGA-B3-3925-01A-02R-1351-07	15.3397	1
TCGA-B3-3926-01A-02R-1351-07	88.2727	2
TCGA-B3-4103-01A-02R-1351-07	45.5069	1
TCGA-B3-4104-01A-02R-1351-07	77.7815	2
TCGA-B3-8121-01A-21R-2404-07	27.4639	1
TCGA-B3-A6W5-01A-12R-A33Z-07	69.3354	2
TCGA-B9-4113-01A-01R-1193-07	48.9798	1
TCGA-B9-4115-01A-01R-1193-07	99.1036	2
TCGA-B9-4115-11A-01R-1758-07	5.52036	1
TCGA-B9-4116-01A-02R-1351-07	11.1973	1
TCGA-B9-4117-01A-02R-1351-07	63.6481	2
TCGA-B9-4617-01A-01R-1193-07	32.0058	1
TCGA-B9-5155-01A-01R-1592-07	79.3916	2
TCGA-B9-5156-01A-01R-1592-07	38.0383	1
TCGA-B9-7268-01A-11R-A32Z-07	64.0073	2
TCGA-B9-A44B-01A-11R-A24Z-07	37.6978	1
TCGA-B9-A5W7-01A-11R-A31O-07	4.09517	1
TCGA-B9-A5W8-01A-11R-A28H-07	47.2389	1
TCGA-B9-A5W9-01A-11R-A28H-07	21.5935	1
TCGA-B9-A69E-01A-11R-A31O-07	82.4198	2
TCGA-B9-A8YH-01A-11R-A37K-07	15.7306	1
TCGA-B9-A8YI-01A-21R-A37K-07	78.5872	2
TCGA-BQ-5875-01A-11R-1592-07	62.339	2
TCGA-BQ-5875-11A-01R-1592-07	51.1483	1
TCGA-BQ-5876-01A-11R-1592-07	54.4016	1
TCGA-BQ-5877-01A-11R-1592-07	76.8854	2
TCGA-BQ-5877-11A-01R-1592-07	8.93389	1
TCGA-BQ-5878-01A-11R-1592-07	92.2942	2
TCGA-BQ-5878-11A-01R-1592-07	19.1755	1
TCGA-BQ-5879-01A-11R-1592-07	76.2738	2
TCGA-BQ-5879-11A-01R-1592-07	63.9086	2
TCGA-BQ-5880-01A-11R-1592-07	81.7028	2
TCGA-BQ-5881-01A-11R-1592-07	81.2941	2
TCGA-BQ-5882-01A-11R-1592-07	53.0854	1
TCGA-BQ-5882-11A-01R-1592-07	95.9446	2
TCGA-BQ-5883-01A-11R-1592-07	60.9758	2
TCGA-BQ-5884-01A-11R-1592-07	66.8872	2
TCGA-BQ-5884-11A-01R-1592-07	54.8028	1
TCGA-BQ-5885-01A-11R-1592-07	67.9336	2
TCGA-BQ-5886-01A-11R-1592-07	9.21377	1
TCGA-BQ-5887-01A-11R-1965-07	25.0532	1
TCGA-BQ-5887-11A-01R-1965-07	92.2039	2
TCGA-BQ-5888-01A-11R-1592-07	95.2601	2
TCGA-BQ-5888-11A-01R-1592-07	56.4567	2
TCGA-BQ-5889-01A-11R-1592-07	70.2689	2
TCGA-BQ-5890-01A-11R-1592-07	27.4073	1
TCGA-BQ-5890-11A-01R-1592-07	62.2374	2
TCGA-BQ-5891-01A-11R-1592-07	78.6101	2
TCGA-BQ-5891-11A-01R-1592-07	32.4997	1
TCGA-BQ-5892-01A-11R-1592-07	53.9315	1
TCGA-BQ-5893-01A-11R-1592-07	51.9752	1
TCGA-BQ-5894-01A-11R-1592-07	12.0228	1
TCGA-BQ-5894-11A-01R-1592-07	40.6238	1
TCGA-BQ-7044-01A-11R-1965-07	81.8119	2
TCGA-BQ-7044-11A-01R-1965-07	66.9676	2
TCGA-BQ-7045-01A-31R-1965-07	25.2674	1
TCGA-BQ-7045-11A-01R-1965-07	6.53081	1
TCGA-BQ-7046-01A-11R-1965-07	31.2862	1
TCGA-BQ-7046-11A-01R-1965-07	67.4301	2
TCGA-BQ-7048-01A-11R-1965-07	13.8018	1
TCGA-BQ-7049-01A-11R-1965-07	9.26671	1
TCGA-BQ-7050-01A-11R-1965-07	72.4125	2
TCGA-BQ-7051-01A-12R-1965-07	80.5856	2
TCGA-BQ-7051-11A-02R-1965-07	51.2944	1
TCGA-BQ-7053-01A-11R-1965-07	56.4911	2
TCGA-BQ-7055-01A-11R-1965-07	30.8064	1
TCGA-BQ-7055-11A-01R-1965-07	28.9874	1
TCGA-BQ-7056-01A-11R-1965-07	88.5006	2
TCGA-BQ-7058-01A-11R-1965-07	99.1486	2
TCGA-BQ-7059-01A-11R-1965-07	58.7518	2
TCGA-BQ-7059-11A-01R-1965-07	46.7891	1
TCGA-BQ-7060-01A-11R-1965-07	74.645	2
TCGA-BQ-7061-01A-11R-1965-07	90.3778	2
TCGA-BQ-7061-11A-01R-1965-07	66.8875	1
TCGA-BQ-7062-01A-11R-1965-07	56.7594	2
TCGA-DW-5560-01A-01R-1592-07	81.9296	2
TCGA-DW-5561-01A-01R-1592-07	92.1489	2
TCGA-DW-7834-01A-11R-2139-07	81.516	2
TCGA-DW-7836-01A-11R-2139-07	12.1865	1
TCGA-DW-7837-01A-11R-2139-07	4.90982	1
TCGA-DW-7838-01A-11R-2139-07	61.5853	2
TCGA-DW-7839-01A-11R-2139-07	73.3719	2
TCGA-DW-7840-01A-11R-A32Z-07	1.1966	1
TCGA-DW-7841-01A-11R-A32Z-07	0.340724	1
TCGA-DW-7842-01A-11R-A32Z-07	34.1248	1
TCGA-DW-7963-01B-11R-A28H-07	97.7005	2
TCGA-DZ-6131-11A-01R-1965-07	72.4923	2
TCGA-DZ-6132-01A-11R-1965-07	51.8271	1
TCGA-DZ-6132-11A-01R-1965-07	67.7862	2
TCGA-DZ-6133-01A-11R-1965-07	25.5151	1
TCGA-DZ-6133-11A-01R-1965-07	55.9997	2
TCGA-DZ-6134-01A-11R-1965-07	82.8052	2
TCGA-DZ-6134-11A-01R-1965-07	75.3998	2
TCGA-DZ-6135-01A-11R-1965-07	89.0948	2
TCGA-EV-5901-01A-11R-1592-07	89.691	2
TCGA-EV-5902-01A-11R-1592-07	58.7252	2
TCGA-EV-5903-01A-11R-1592-07	81.2546	2
TCGA-F9-A4JJ-01A-11R-A24Z-07	4.36185	1
TCGA-F9-A7Q0-01A-11R-A36F-07	0.646426	1
TCGA-F9-A7VF-01A-11R-A33Z-07	21.6244	1
TCGA-F9-A8NY-01A-11R-A36F-07	37.4699	1
TCGA-F9-A97G-01A-11R-A38C-07	26.6732	1
TCGA-G7-6789-01A-11R-1965-07	2.40404	1
TCGA-G7-6790-01A-11R-1965-07	29.5413	1
TCGA-G7-6792-01A-21R-1965-07	93.3172	2
TCGA-G7-6793-01A-11R-1965-07	31.6674	1
TCGA-G7-6795-01A-11R-1965-07	13.8404	1
TCGA-G7-6796-01A-11R-1965-07	25.3251	1
TCGA-G7-6797-01A-11R-1965-07	59.5143	2
TCGA-G7-7501-01A-11R-2204-07	40.6647	1
TCGA-G7-7502-01A-11R-2204-07	96.9248	2
TCGA-G7-A4TM-01A-11R-A31O-07	50.807	1
TCGA-G7-A8LB-01A-11R-A36F-07	78.1098	2
TCGA-G7-A8LC-01A-11R-A36F-07	56.865	2
TCGA-G7-A8LD-01A-11R-A36F-07	12.942	1
TCGA-G7-A8LE-01A-11R-A36F-07	19.5549	1
TCGA-GL-6846-01A-11R-1965-07	3.32523	1
TCGA-GL-6846-11A-01R-1965-07	60.2548	2
TCGA-GL-7773-01A-11R-A32Z-07	18.3906	1
TCGA-GL-7966-01A-11R-2204-07	22.7852	1
TCGA-GL-7966-11A-01R-2204-07	5.60533	1
TCGA-GL-8500-01A-11R-2404-07	97.3435	2
TCGA-GL-A4EM-01A-11R-A24Z-07	89.8277	2
TCGA-GL-A59R-01A-11R-A26U-07	22.4863	1
TCGA-GL-A59R-11A-11R-A26U-07	86.7471	2
TCGA-GL-A59T-01A-21R-A28H-07	80.1185	2
TCGA-GL-A9DC-01A-11R-A37K-07	77.2295	2
TCGA-GL-A9DD-01A-11R-A37K-07	6.11564	1
TCGA-GL-A9DE-01A-11R-A37K-07	67.2686	2
TCGA-GL-A9DE-11A-11R-A37K-07	67.7425	2
TCGA-HE-7128-01A-11R-1965-07	25.2186	1
TCGA-HE-7129-01A-11R-1965-07	59.1774	2
TCGA-HE-7130-01A-11R-1965-07	88.8075	2
TCGA-HE-A5NF-01A-11R-A26U-07	36.8996	1
TCGA-HE-A5NH-01A-11R-A26U-07	85.7345	2
TCGA-HE-A5NI-01A-11R-A26U-07	56.1648	2
TCGA-HE-A5NJ-01A-11R-A26U-07	9.24438	1
TCGA-HE-A5NK-01A-11R-A26U-07	97.5742	2
TCGA-HE-A5NL-01A-11R-A26U-07	79.3777	2
TCGA-IA-A40U-01A-11R-A24Z-07	50.415	1
TCGA-IA-A40X-01A-11R-A24Z-07	36.0356	1
TCGA-IA-A40Y-01A-11R-A24Z-07	49.8232	1
TCGA-IA-A83S-01A-11R-A355-07	53.599	1
TCGA-IA-A83T-01A-11R-A355-07	96.544	2
TCGA-IA-A83V-01A-11R-A355-07	2.26411	1
TCGA-IA-A83W-01A-11R-A355-07	97.6013	2
TCGA-IZ-8195-01A-31R-2404-07	37.1964	1
TCGA-IZ-8196-01A-11R-2404-07	70.0578	2
TCGA-IZ-A6M8-01A-11R-A31O-07	89.7691	2
TCGA-IZ-A6M9-01A-11R-A31O-07	9.56692	1
TCGA-J7-6720-01A-11R-2139-07	50.6599	1
TCGA-J7-8537-01A-11R-2404-07	74.11	2
TCGA-J7-A8I2-01A-12R-A36F-07	56.8298	2
TCGA-KV-A6GD-01A-11R-A31O-07	38.4644	1
TCGA-KV-A6GE-01A-11R-A31O-07	43.7352	1
TCGA-KV-A74V-01A-11R-A33Z-07	72.0981	2
TCGA-MH-A55W-01A-11R-A26U-07	47.7818	1
TCGA-MH-A55Z-01A-11R-A26U-07	37.8428	1
TCGA-MH-A560-01A-11R-A26U-07	10.966	1
TCGA-MH-A561-01A-11R-A26U-07	71.0665	2
TCGA-MH-A562-01A-11R-A26U-07	63.1267	2
TCGA-MH-A854-01A-11R-A355-07	83.5988	2
TCGA-MH-A855-01A-11R-A355-07	19.644	1
TCGA-MH-A856-01A-11R-A355-07	41.5429	1
TCGA-MH-A857-01A-11R-A355-07	9.44757	1
TCGA-O9-A75Z-01A-11R-A33Z-07	37.1101	1
TCGA-P4-A5E6-01A-11R-A28H-07	36.1897	1
TCGA-P4-A5E7-01A-31R-A28H-07	46.8128	1
TCGA-P4-A5E8-01A-11R-A28H-07	57.2598	2
TCGA-P4-A5E8-11A-12R-A28H-07	88.8915	2
TCGA-P4-A5EA-01A-11R-A28H-07	90.4344	2
TCGA-P4-A5EB-01A-11R-A28H-07	5.55052	1
TCGA-P4-A5ED-01A-11R-A28H-07	19.7432	1
TCGA-P4-A5ED-11A-11R-A28H-07	38.3635	1
TCGA-P4-AAVK-01A-11R-A42S-07	72.0068	2
TCGA-P4-AAVL-01A-11R-A42S-07	46.7481	1
TCGA-P4-AAVM-01A-11R-A42S-07	6.12074	1
TCGA-P4-AAVO-01A-11R-A42S-07	37.9458	1
TCGA-PJ-A5Z8-01A-11R-A28H-07	51.6801	1
TCGA-PJ-A5Z9-01A-11R-A28H-07	59.6195	2
TCGA-Q2-A5QZ-01A-11R-A28H-07	7.29116	1
TCGA-SX-A71R-01A-12R-A33Z-07	45.4432	1
TCGA-SX-A71S-01A-11R-A33Z-07	13.7422	1
TCGA-SX-A71U-01A-12R-A33Z-07	68.7794	2
TCGA-SX-A71V-01A-11R-A33Z-07	27.0097	1
TCGA-SX-A71W-01A-12R-A355-07	39.0721	1
TCGA-SX-A7SL-01A-11R-A355-07	86.2176	2
TCGA-SX-A7SM-01A-11R-A355-07	89.4245	2
TCGA-SX-A7SN-01A-11R-A355-07	91.9267	2
TCGA-SX-A7SO-01A-11R-A355-07	78.7828	2
TCGA-SX-A7SP-01A-11R-A355-07	72.2271	2
TCGA-SX-A7SQ-01A-12R-A36F-07	27.4364	1
TCGA-SX-A7SR-01A-12R-A36F-07	33.3963	1
TCGA-SX-A7SS-01A-11R-A36F-07	15.1343	1
TCGA-SX-A7SU-01A-11R-A36F-07	84.4959	2
TCGA-UN-AAZ9-01A-11R-A38C-07	7.43631	1
TCGA-UZ-A9PJ-01A-11R-A38C-07	69.5599	2
TCGA-UZ-A9PK-01A-11R-A38C-07	29.0765	1
TCGA-UZ-A9PL-01A-11R-A38C-07	93.7742	2
TCGA-UZ-A9PM-01A-21R-A38C-07	23.932	1
TCGA-UZ-A9PN-01A-11R-A38C-07	32.9417	1
TCGA-UZ-A9PO-01A-11R-A38C-07	56.8585	2
TCGA-UZ-A9PP-01A-11R-A42S-07	27.8183	1
TCGA-UZ-A9PQ-01A-11R-A42S-07	81.1708	2
TCGA-UZ-A9PR-01A-11R-A42S-07	67.8415	2
TCGA-UZ-A9PS-01A-11R-A42S-07	44.8429	1
TCGA-UZ-A9PS-05A-11R-A42S-07	2.26934	1
TCGA-UZ-A9PU-01A-11R-A42S-07	93.0656	2
TCGA-UZ-A9PV-01A-11R-A42S-07	85.001	2
TCGA-UZ-A9PX-01A-11R-A42S-07	24.4279	1
TCGA-UZ-A9PZ-01A-11R-A42S-07	67.6055	2
TCGA-UZ-A9Q0-01A-12R-A42S-07	89.4338	2
TCGA-UZ-A9Q1-01A-11R-A42S-07	96.6641	2
TCGA-V9-A7HT-01A-11R-A33Z-07	98.1224	2
TCGA-WN-A9G9-01A-12R-A37K-07	83.6294	2
TCGA-WN-AB4C-01A-11R-A42S-07	55.6346	2
TCGA-Y8-A894-01A-11R-A36F-07	94.509	2
TCGA-Y8-A895-01A-11R-A36F-07	96.2948	2
TCGA-Y8-A896-01A-11R-A36F-07	70.3746	2
TCGA-Y8-A897-01A-11R-A36F-07	30.3464	1
TCGA-Y8-A898-01A-11R-A355-07	52.5145	1
TCGA-Y8-A8RY-01A-11R-A37K-07	61.9747	2
TCGA-Y8-A8RY-11A-11R-A37K-07	52.2539	1
TCGA-Y8-A8RZ-01A-11R-A37K-07	21.1275	1
TCGA-Y8-A8S0-01A-11R-A37K-07	15.2924	1
TCGA-Y8-A8S1-01A-11R-A37K-07	55.264	2
